# Supplementary material
Source: MDPI journal article supplement (https://www.mdpi.com/2624-599X/5/2/25)
Supplement: s1 [file s1]

Archive with 1 entries (1 files):
- acoustics-2132759-SI.pdf
